# Supplementary material
Source: Springer Nature journal article supplement (https://www.springermedizin.de/resource/supplementary/12889_2013_5527_MOESM2_ESM.pdf/9495632)

# ROC Curve

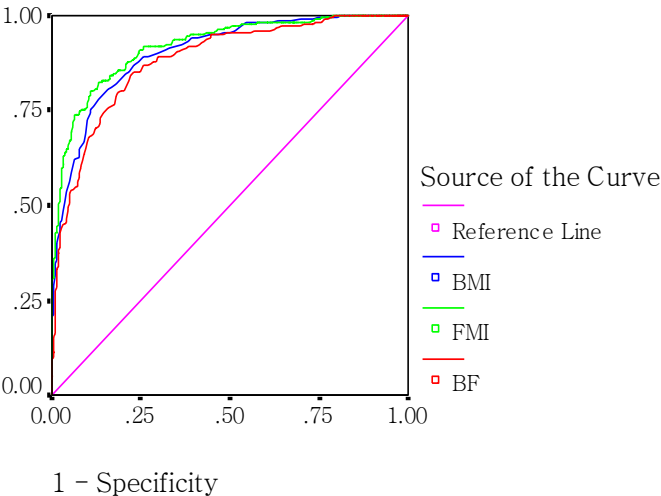

Diagonal segments are produced by ties.

Supplement: MOESM2 [file 9495632]
